# Supplementary material
Source: Springer Nature journal article supplement (https://www.springermedizin.de/resource/supplementary/13000_2013_809_MOESM2_ESM.pdf/9625106)

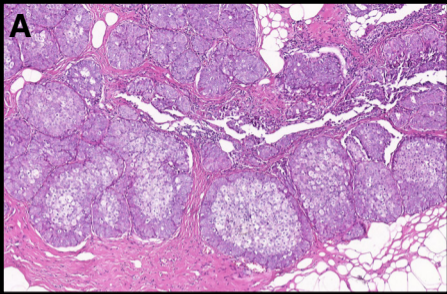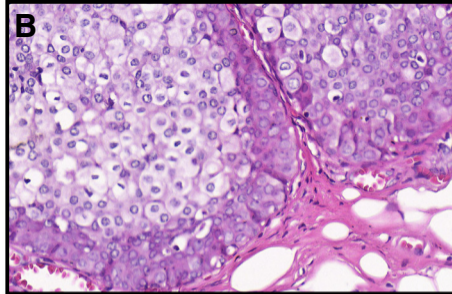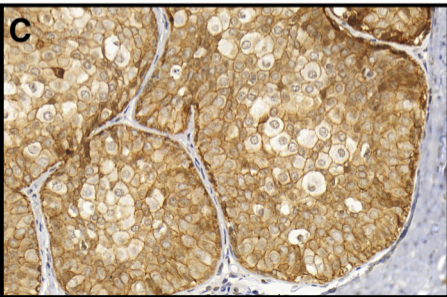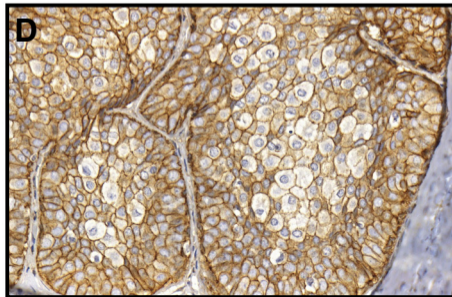

Supplement: MOESM2 [file 9625106]
